# Supplementary material for: Heterogeneous grain growth and vertical mass transfer within a snow layer under a temperature gradient
Source: Copernicus journal article supplement (doi:10.5194/tc-17-3553-2023), 2023-08-25
Supplement: Supplementary file 1 [file tc-17-3553-2023-supplement.zip]

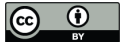

## *Supplement of*

# **Heterogeneous grain growth and vertical mass transfer within a snow layer under a temperature gradient**

**Lisa Bouvet et al.**

*Correspondence to:* Lisa Bouvet ([lisa.bouvet@univ-grenoble-alpes.fr](mailto:lisa.bouvet@univ-grenoble-alpes.fr))

- [tc-17-3553-2023-supplement-title-page.pdf](#)
- [Supplement\\_data](#)
  - [ExpA\\_tomo\\_big.ods](#)
  - [ExpA\\_tomo\\_small.ods](#)
  - [ExpB\\_tomo\\_big.ods](#)
  - [PT100\\_SHT25\\_data.ods](#)

The copyright of individual parts of the supplement might differ from the article licence.
